# Supplementary material for: Organic modification of the interlayer surface of kaolinite with propanediols by transesterificationElectronic supplementary information (ESI) available: Fig. S1: XRD patterns of (A) methoxy-modified kaolinite, (B) Kao–1,3PDint, (C) Kao–1,3PDint washed by ethanol, (D) Kao–1,3PDgraft and (E) Kao–1,3PDgraft washed by ethanol. See http://www.rsc.org/suppdata/jm/b2/b211844k/
Source: Royal Society of Chemistry journal article supplement (doi:10.1039/b211844k), 2003-03-31
Supplement: b211844k.doc [file b211844k.doc]

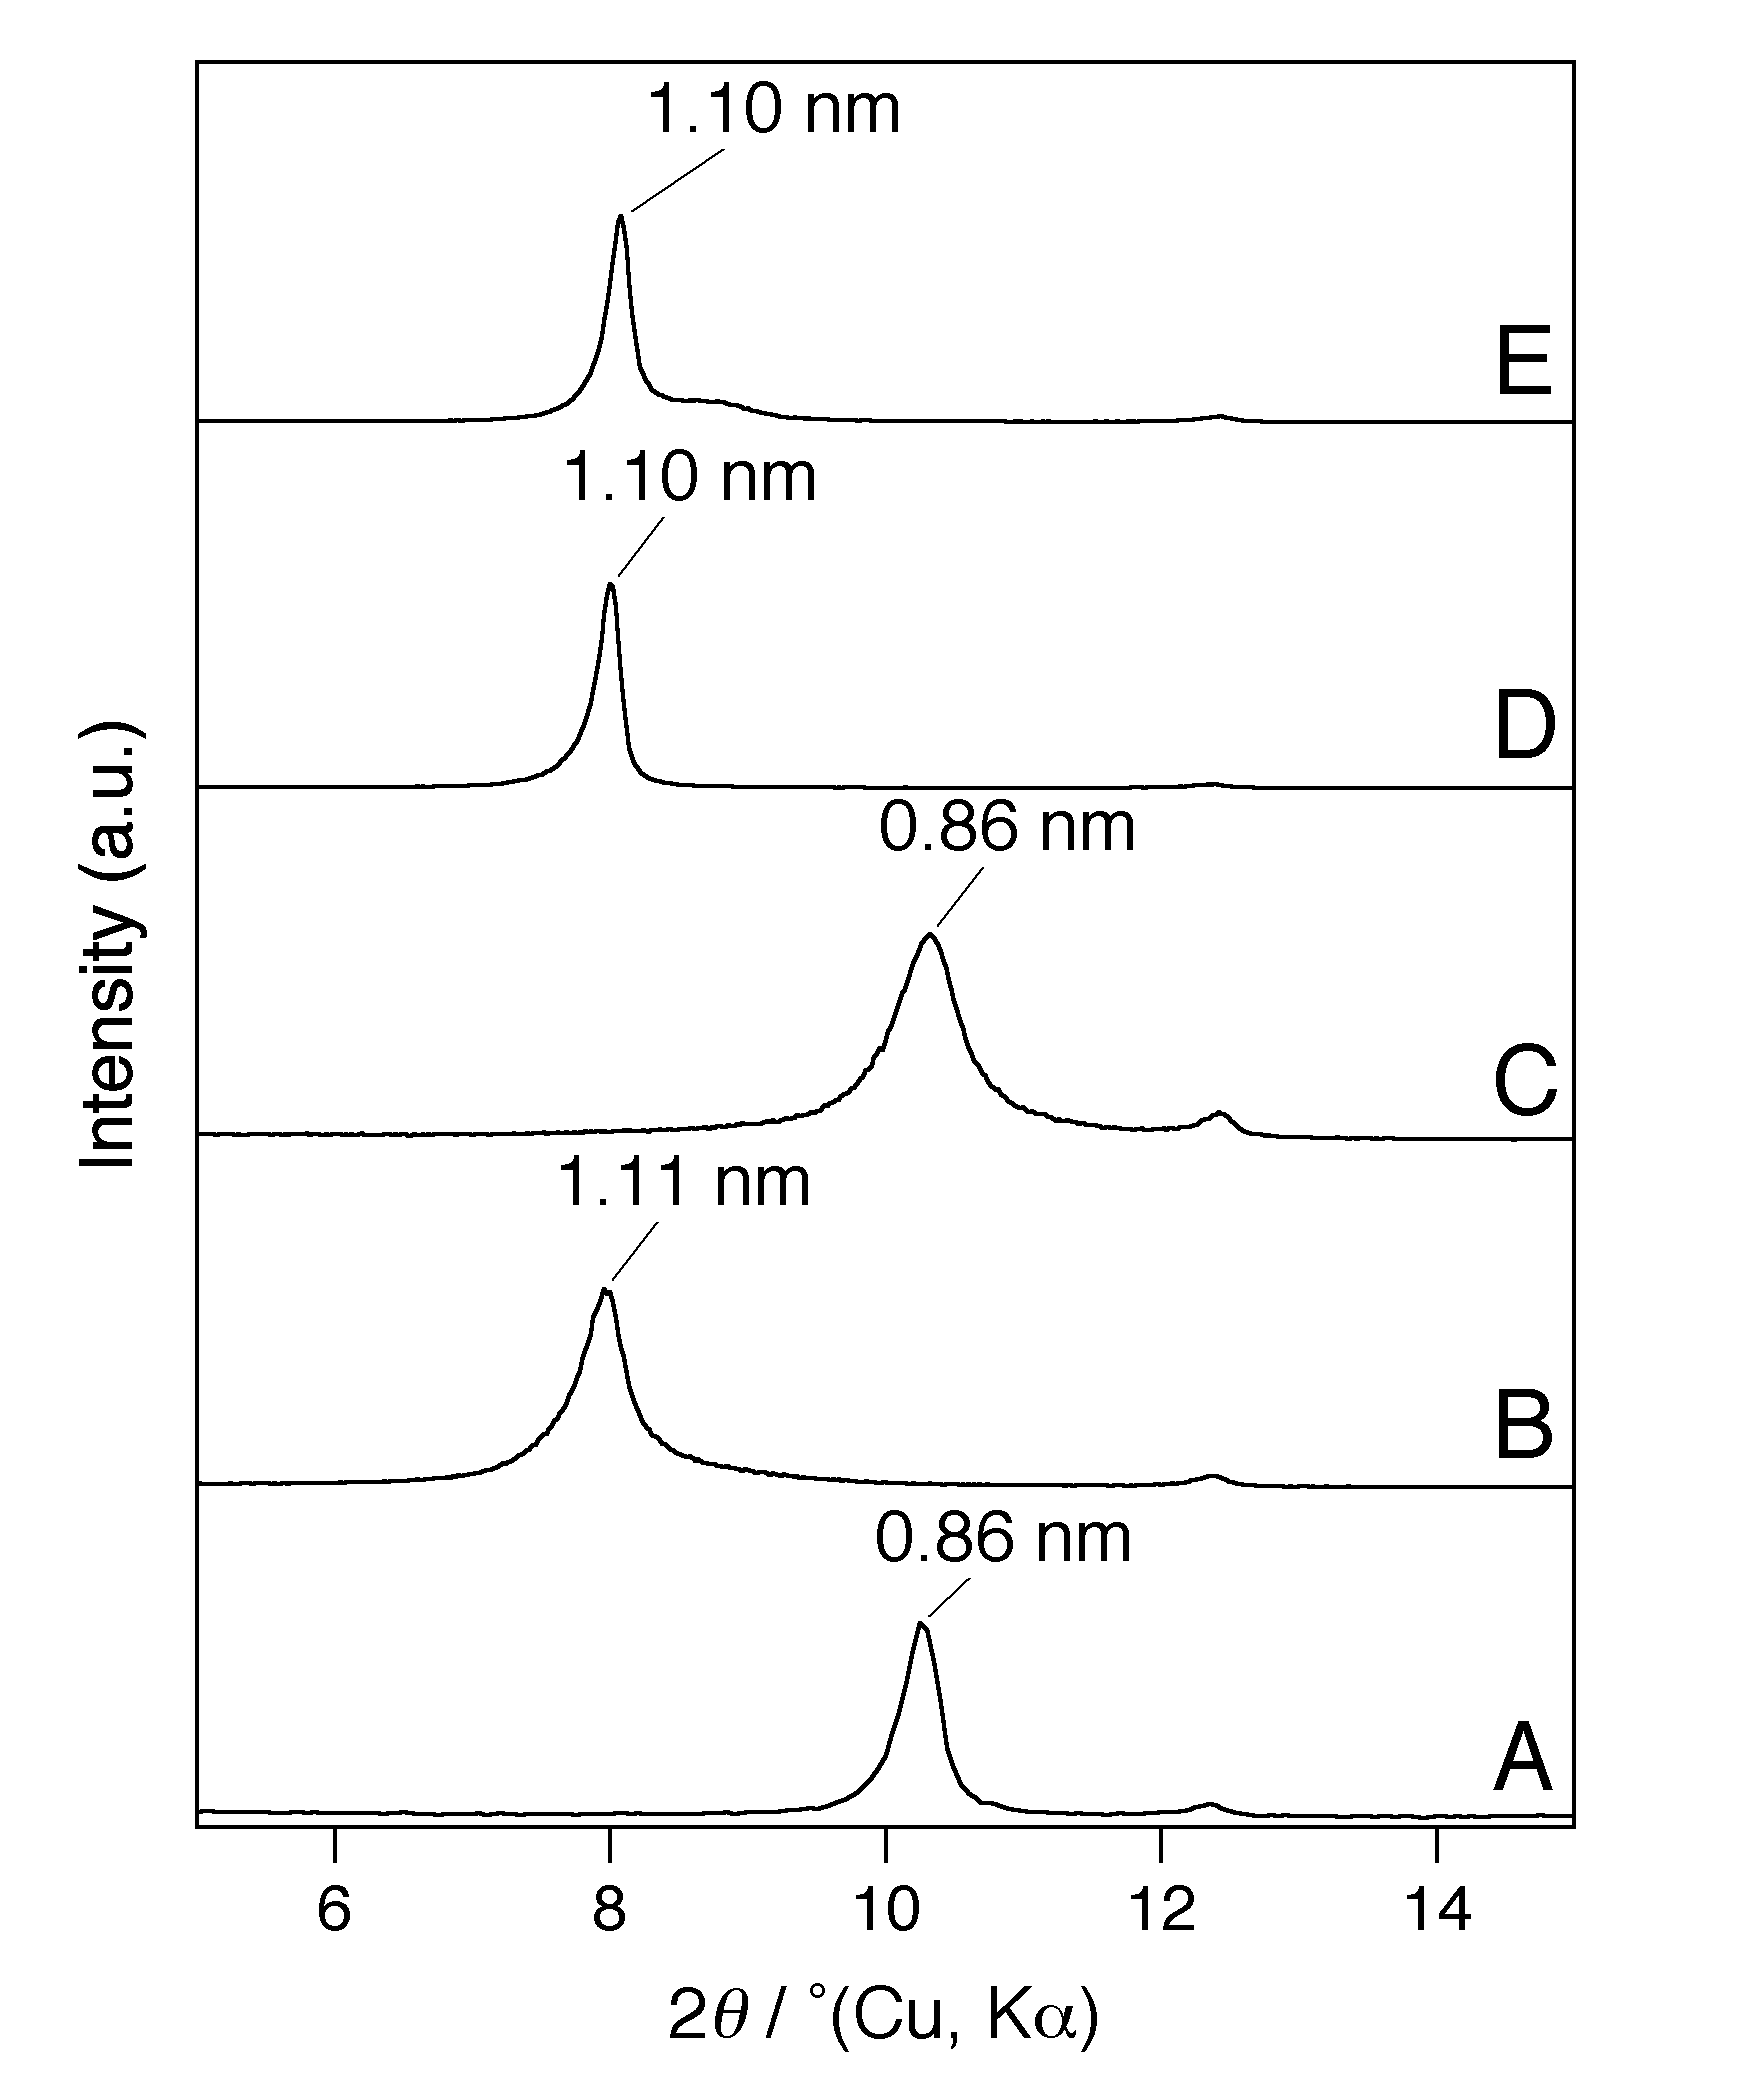
Figure S1 XRD patterns of (A) methoxy-modified kaolinite, (B) Kao–1,3PDint, (C) Kao–1,3PDint washed by ethanol, (D) Kao–1,3PDgraft, and (E) Kao–1,3PDgraft washed by ethanol

Itagaki et al.
